# Supplementary material
Source: HighWire-hosted journal article supplement (https://openres.ersjournals.com/content/7/2/00108-2021)
Supplement: inline-supplementary-material-1 [file inline-supplementary-material-1.pdf]

1                                           **- ONLINE SUPPLEMENTARY MATERIAL -**  
2                                           **Benefits of pulmonary rehabilitation in COVID-19 –**  
3                                           **a prospective observational cohort study**  
4  
5  
6  
7

8 **Authors:** Rainer Gloeckl PhD<sup>1,2</sup>, Daniela Leitl MSc\* <sup>1,2</sup>, Inga Jarosch<sup>1,2</sup>, Tessa Schneeberger<sup>1,2</sup>,  
9 Christoph Nell PhD<sup>3</sup>, Nikola Stenzel PhD<sup>4</sup>, Claus F. Vogelmeier MD<sup>5</sup>, Klaus Kenn MD<sup>1,2</sup>, Andreas R.  
10 Koczulla MD<sup>1,2,6</sup>

11  
12  
13  
14 **Affiliations:**

15 <sup>1</sup> Department of Pulmonary Rehabilitation, Philipps-University of Marburg, Member of the  
16 German Center for Lung Research (DZL), Marburg, Germany

17 <sup>2</sup> Institute for Pulmonary Rehabilitation Research, Schoen Klinik Berchtesgadener Land –  
18 Schoenau am Koenigssee; Germany

19 <sup>3</sup> Department of Pulmonology, Philipps-University Marburg, Germany

20 <sup>4</sup> Psychologische Hochschule Berlin (PHB), Berlin

21 <sup>5</sup> Department of Medicine, Pulmonary and Critical Care Medicine, University Medical Centre  
22 Giessen and Marburg, Philipps-Universität Marburg, Germany. Member of the German  
23 Center for Lung Research (DZL), Marburg, Germany

24 <sup>6</sup> Teaching hospital, Paracelsus Medical University, Salzburg, Austria

25 **Additional information on the comparison group of idiopathic pulmonary fibrosis**  
 26 **(IPF) patients:**

27 The comparison group consisted of 17 IPF patients that were recruited for a randomized,  
 28 controlled trial, investigating the benefits of pulmonary rehabilitation. These 17 patients  
 29 belonged to the control group and received usual care (without pulmonary rehabilitation).  
 30 Results from this study were recently published by our working group (Jarosch et al. J Clin  
 31 Med 2020; 9, 1567). COVID-19 patients in the current study showed restrictive lung pattern  
 32 similar to patients with chronic fibrotic lung diseases. Since the current study was not a  
 33 randomized, controlled trial we draw an indirect comparison by using these IPF patients as  
 34 a non-PR comparison group.

35 Description of baseline characteristics can be found in table S1. Furthermore, a comparison  
 36 of changes following 3-weeks of rehabilitation in COVID-19 patients versus the outcomes of  
 37 usual care in IPF patients after 2 months can be found in table S2.

38  
 39 Table S1. Baseline characteristics post-COVID-19 patients on admission of pulmonary rehabilitation (PR) and  
 40 the comparison group of non-PR-patients with idiopathic pulmonary fibrosis (IPF)

|                                            | Mild/moderate<br>COVID-19         | Severe/critical<br>COVID-19   | Non PR<br>IPF group          | p-value          |
|--------------------------------------------|-----------------------------------|-------------------------------|------------------------------|------------------|
| <b>General</b>                             |                                   |                               |                              |                  |
| n                                          | 24                                | 26                            | 17                           |                  |
| Age, ys                                    | <b>52***</b><br>[47 - 56]         | 66<br>[60 - 71]               | <b>65</b><br>[58 - 75]       | <b>&lt;0.001</b> |
| Sex, female (%)                            | <b>20 (83%)***</b>                | 8 (31%)                       | <b>3 (18%)</b>               | <b>&lt;0.001</b> |
| BMI, kg/m <sup>2</sup>                     | 24.7<br>[22.0 - 29.8]             | 26.9<br>[24.2 - 29.2]         | 26.8<br>[24.8 - 28.8]        | 0.13             |
| Oxygen therapy, n (%)                      | <b>0* (0%)</b>                    | 7 (27%)                       | <b>6 (35%)</b>               | <b>0.007</b>     |
| <b>Respiratory parameters</b>              |                                   |                               |                              |                  |
| PaO <sub>2</sub> , mmHg                    | 73.1<br>[63.6 - 77.4]             | 73.2<br>[62.7 - 77.6]         | 65.0<br>[74.0 - 47.1]        | 0.10             |
| PaCO <sub>2</sub> , mmHg                   | 35.0<br>[32.6 - 38.5]             | 35.5<br>[31.8 - 36.9]         | 37.4<br>[34.6 - 40.3]        | 0.25             |
| DLCO, %predicted                           | <b>57.0*</b><br>[50.0 - 65.5]     | 55.8<br>[37.2 - 63.0]         | <b>32.0</b><br>[20.0 - 48.0] | <b>0.043</b>     |
| TLC, %predicted                            | 82.2<br>[65.3 - 88.9]             | 80.9<br>[64.4 - 88.6]         | 65.5<br>[58.1 - 78.5]        | 0.24             |
| FVC, %predicted                            | 80.0<br>[59.2 - 90.9]             | 75.1<br>[59.8 - 90.6]         | 71.1<br>[62.2 - 88.5]        | 0.91             |
| FEV <sub>1</sub> , %predicted              | 83.3<br>[65.5 - 101.1]            | 79.1<br>[65.8 - 99.7]         | 82.9<br>[61.0 - 91.2]        | 0.65             |
| FRC, %predicted                            | <b>113.0***</b><br>[95.0 - 127.0] | 82.6<br>[70.3 - 97.4]         | 73.2<br>[55.3 - 100.1]       | <b>&lt;0.001</b> |
| <b>Exercise performance</b>                |                                   |                               |                              |                  |
| 6MWD, m                                    | 509<br>[426 - 539]                | <b>344*</b><br>[244 - 392]    | <b>416</b><br>[278 - 483]    | <b>&lt;0.001</b> |
| 6MWD, %predicted                           | 70.1<br>[57.8 - 80.2]             | 52.5<br>[42.4 - 58.3]         | 51.5<br>[40.4 - 70.5]        | <b>0.003</b>     |
| 6MWT SpO <sub>2</sub> nadir, %             | <b>96***</b><br>[94 - 97]         | <b>92*</b><br>[88 - 94]       | <b>81</b><br>[71 - 90]       | <b>&lt;0.001</b> |
| End-6MWT dyspnea, Borg scale               | 4<br>[3 - 5]                      | 5<br>[4 - 6]                  | 3<br>[2 - 7]                 | 0.16             |
| <b>Quality of life</b>                     |                                   |                               |                              |                  |
| SF-36 physical component sum score, points | 31.8<br>[26.2 - 35.7]             | <b>30.2*</b><br>[22.7 - 36.8] | <b>39.7</b><br>[30.5 - 46.9] | <b>0.023</b>     |
| SF-36 mental component sum score, points   | 48.6<br>[37.2 - 53.8]             | 38.5<br>[30.1 - 52.8]         | 49.0<br>[35.4 - 52.8]        | 0.35             |

41 Data are presented as median and percentage or median and interquartile range.  
 42 Significance between COVID-subgroup and IPF comparison group: \*p<0.05; \*\*p<0.01; \*\*\*p<0.001  
 43 Abbreviations: 6MWD – 6-minute walk distance, 6MWT – 6-minute walk test, BMI: Body Mass Index, COVID-19: Corona Virus  
 44 Disease 2019, DLCO – diffusion lung capacity for carbon monoxide, FEV<sub>1</sub> – forced expiratory volume in 1 second, FVC –  
 45 forced vital capacity, O<sub>2</sub>: oxygen, PaCO<sub>2</sub> – partial carbon dioxide pressure, PaO<sub>2</sub> – partial oxygen pressure, SpO<sub>2</sub> – oxygen  
 46 saturation, TLC – total lung capacity

47 Table S2. Outcomes of a comprehensive inpatient pulmonary rehabilitation (PR) in 50 post-acute  
 48 COVID-19 patients and a comparison group of 17 non-PR patients with idiopathic pulmonary fibrosis  
 49 (IPF)

|                                            | <i>mild/moderate<br/>COVID-19<br/>(n=24)</i> | <i>severe/critical<br/>COVID-19<br/>(n=26)</i> | <i>non-PR<br/>IPF group<br/>(n=17)</i> | <i>p-value</i>   |
|--------------------------------------------|----------------------------------------------|------------------------------------------------|----------------------------------------|------------------|
| <b>Respiratory parameters</b>              |                                              |                                                |                                        |                  |
| PaO <sub>2</sub> , mmHg                    | 2.7<br>[-0.9 - 10.8]                         | 2.5<br>[-1.2 - 10.5]                           | 0.6<br>[-6.5 - 5.7]                    | 0.38             |
| PaCO <sub>2</sub> , mmHg                   | -1.2<br>[-2.7 - 2.5]                         | -0.2<br>[-2.9 - 2.7]                           | 1.3<br>[-1.9 - 2.0]                    | 0.37             |
| DLCO, %predicted                           | 4.5<br>[-1.8 - 16.5]                         | <b>3.7*</b><br>[-0.5 - 12.7]                   | <b>-1.0</b><br>[-3.6 - 3.5]            | <b>0.038</b>     |
| TLC, %predicted                            | -1.1<br>[-4.7 - 10.7]                        | 0.1<br>[-4.3 - 10.5]                           | 0.0<br>[-4.0 - 1.8]                    | 0.69             |
| FVC, %predicted                            | 7.7<br>[1.0 - 17.8]                          | 11.3<br>[1.0 - 16.9]                           | 1.0<br>[-4.1 - 7.3]                    | 0.06             |
| FEV <sub>1</sub> , %predicted              | <b>11.8**</b><br>[3.3 - 18.1]                | <b>15.7**</b><br>[3.7 - 17.5]                  | <b>0.5</b><br>[-4.0 - 4.5]             | <b>0.002</b>     |
| FVC, %predicted                            | 0.0<br>[-5.0 - 11.0]                         | 2.0<br>[-6.5 - 9.1]                            | -1.6<br>[-9.3 - 9.6]                   | 0.882            |
| <b>Exercise performance</b>                |                                              |                                                |                                        |                  |
| 6MWD, m                                    | <b>48**</b><br>[35 - 113]                    | <b>124***</b><br>[75 - 145]                    | <b>-8</b><br>[-40 - 30]                | <b>&lt;0.001</b> |
| 6MWD, %predicted                           | <b>10.9**</b><br>[4.7 - 14.6]                | <b>18.0***</b><br>[11.2 - 23.1]                | <b>-4.1</b><br>[-5.9 - 4.5]            | <b>&lt;0.001</b> |
| 6MWT SpO <sub>2</sub> nadir, %             | 0.0<br>[-2.0 - 1.0]                          | 1.0<br>[-1.0 - 2.5]                            | 0.5<br>[-3.0 - 7.3]                    | 0.45             |
| End-6MWT dyspnea, Borg scale               | 0<br>[-1 - 1]                                | 0<br>[-2 - 1]                                  | 0<br>[-2 - 1]                          | 0.98             |
| <b>Quality of life</b>                     |                                              |                                                |                                        |                  |
| SF-36 physical component sum score, points | -0.1<br>[-4.0 - 9.9]                         | <b>4.5*</b><br>[0.5 - 9.5]                     | <b>-1.4</b><br>[-4.2 - 3.2]            | <b>0.019</b>     |
| SF-36 mental component sum score, points   | 5.6<br>[1.4 - 9.2]                           | 14.4<br>[-0.6 - 24.5]                          | -6.3<br>[-1.0 - 4.4]                   | 0.099            |

50 Data are presented as median and percentage or median and interquartile range.  
 51 Abbreviations: 6MWD – 6-minute walk distance, 6MWT – 6-minute walk test, DLCO – diffusion lung capacity for carbon  
 52 monoxide, FEV<sub>1</sub> – forced expiratory volume in 1 second, FVC – forced vital capacity, PaCO<sub>2</sub> – partial carbon dioxide pressure,  
 53 PaO<sub>2</sub> – partial oxygen pressure, SpO<sub>2</sub> – oxygen saturation, TLC – total lung capacity

54  
55  
56  
57

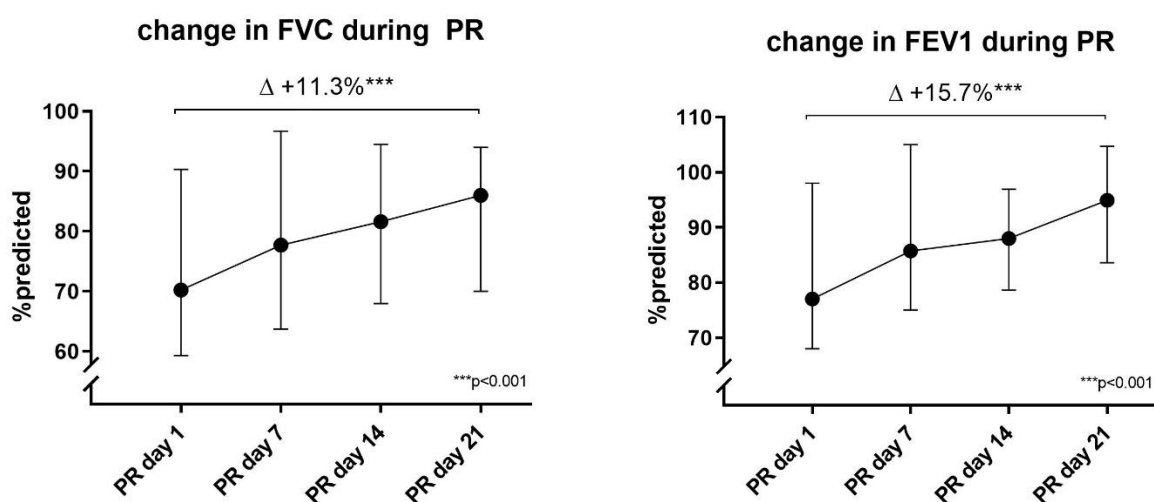

58 Figure S1. Change in forced vital capacity (FVC) and forced expiratory volume in 1 second (FEV<sub>1</sub>)  
 59 during pulmonary rehabilitation (PR) in 26 patients with post-acute severe to critical COVID-19.  
 60 Data are presented as median and interquartile range.  
 61  
 62

63  
64

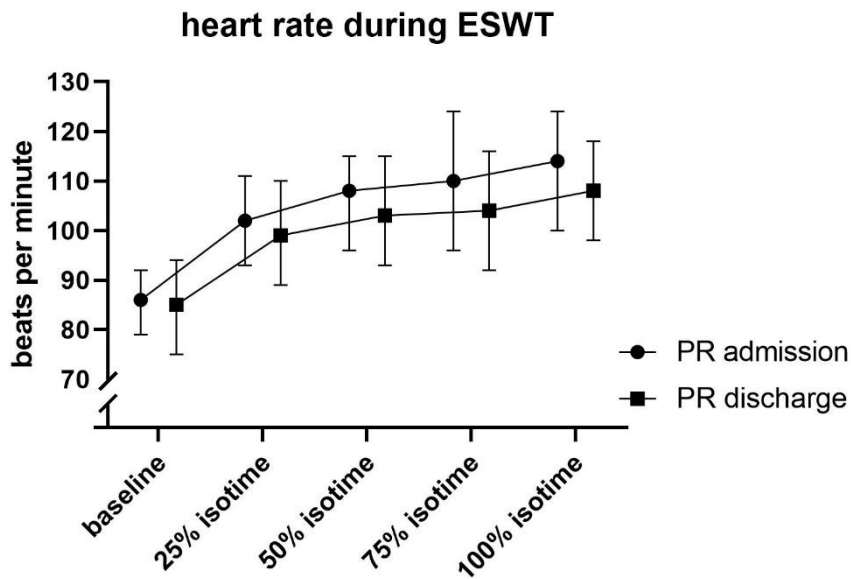

65  
66 Figure S2. Development of heart rate during endurance shuttle walk test (ESWT) from  
67 baseline to isotime in 26 patients with post-acute severe to critical COVID-19 before and  
68 after pulmonary rehabilitation (PR). Data are presented as median and interquartile range.

69  
70  
71

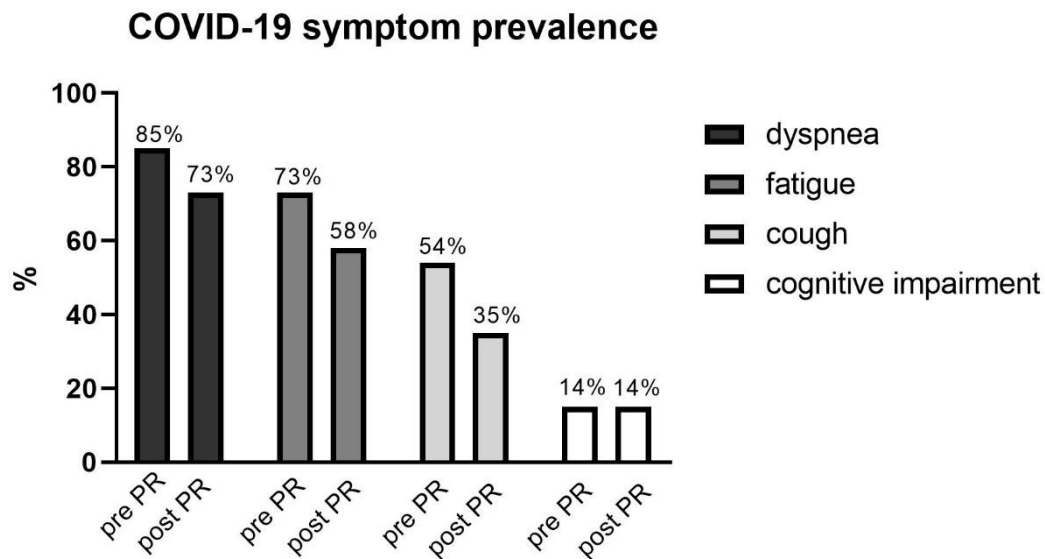

72  
73 Figure S3. Prevalence of COVID-19 symptoms in 26 patients with severe to critical COVID-19 pre and  
74 post a 3-week comprehensive inpatient pulmonary rehabilitation. Symptoms were assessed by  
75 interviewing patients. Therefore, a list of typical COVID-19 symptoms was read to them and patients  
76 were asked to rate yes or no if they perceive any of the symptoms. None of the changes was  
77 significantly different.

78
